# Supplementary material for: How many parameters are needed to represent polar sea ice surface patterns and heterogeneity?
Source: Copernicus journal article supplement (doi:10.5194/tc-18-4335-2024), 2024-09-23
Supplement: Supplementary file 1 [file tc-18-4335-2024-supplement.pdf]

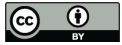

*Supplement of*

## **How many parameters are needed to represent polar sea ice surface patterns and heterogeneity?**

**Joseph Fogarty et al.**

*Correspondence to:* Elie Bou-Zeid (ebouzeid@princeton.edu)

The copyright of individual parts of the supplement might differ from the article licence.

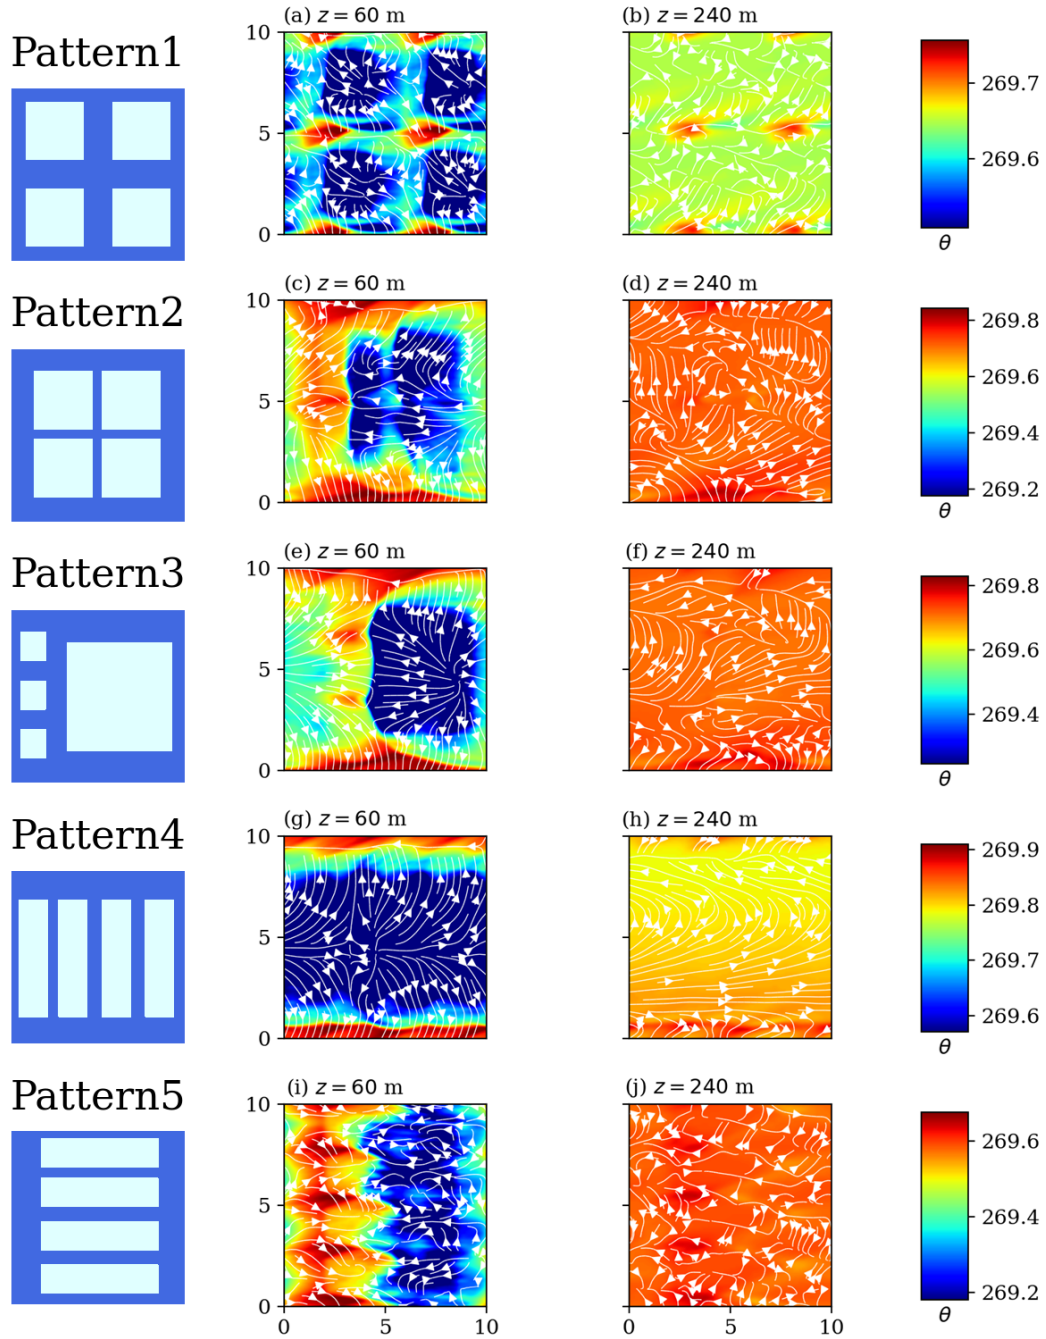

**Figure S1.** An  $x - y$  planar view of  $\bar{\theta}$  in each pattern simulation in the corresponding paper. The left column is at a height of 60m and the right column is at a height of 240m. Streamlines represent the deviation from the mean wind,  $(u - u_g, v - v_g)$ . Each row represents a different simulation.

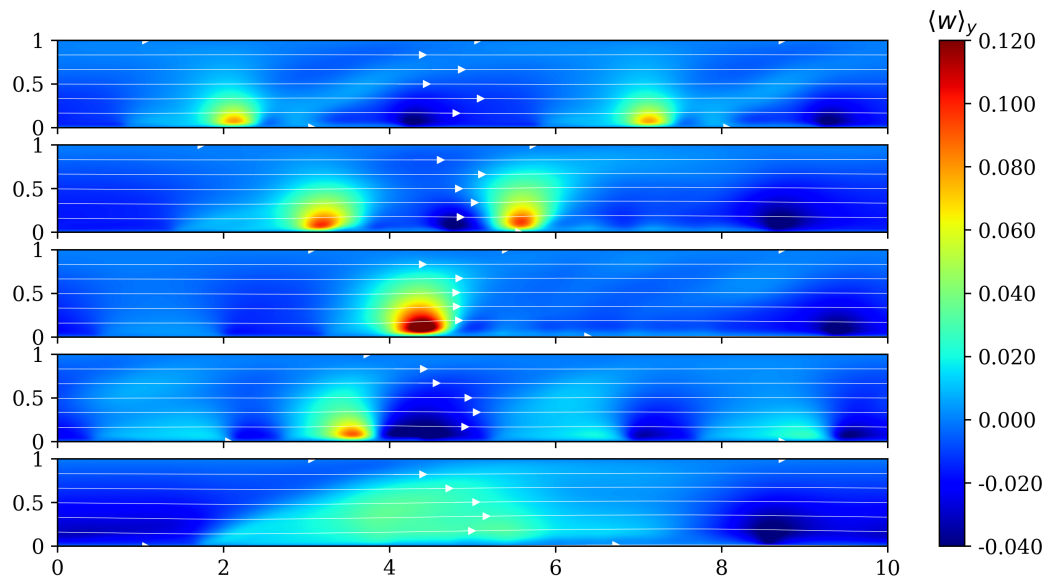

**Figure S2.** An  $x - z$  planar view of  $\langle \bar{w} \rangle_y$  in each pattern simulation. Each row represents a simulation (Pattern1 at the top, Pattern5 at the bottom) in the corresponding paper. Streamlines represent the mean wind,  $(u, w)$ .
